# Supplementary material
Source: Springer Nature journal article supplement (https://www.springermedizin.de/resource/supplementary/12958_2011_854_MOESM6_ESM.pdf/9569002)

# Immunostaining- Annexin A2 (ANXA2)

Primary hEEC cells

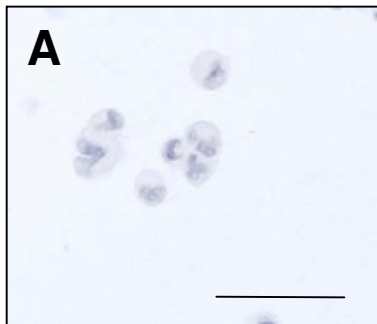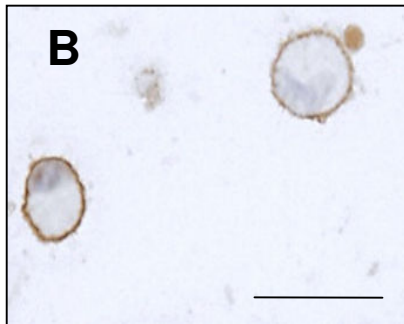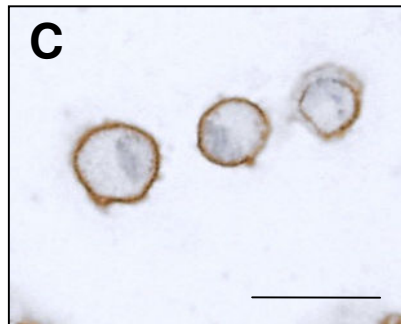

ECC-1 cells

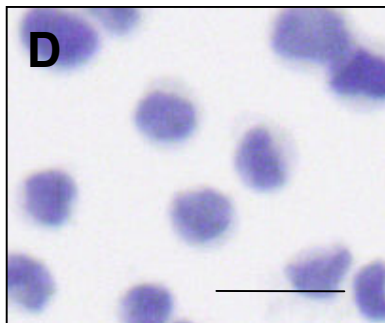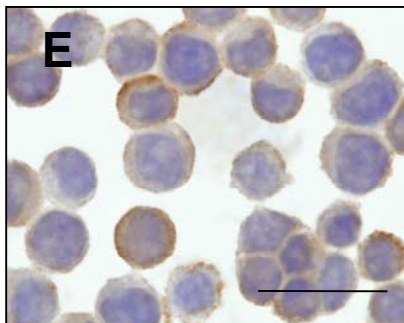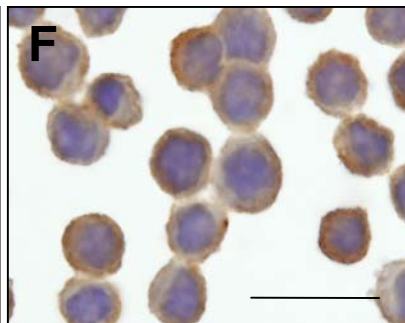

Supplement: MOESM6 [file 9569002]
